# Supplementary material for: Colloidal TiO2 nanocrystals with engineered defectivity and optical properties
Source: Royal Society of Chemistry journal article supplement (doi:10.1039/d4nh00143e), 2024-01-01
Supplement: d4nh00143e1.pdf [file d4nh00143e1.pdf]

# Colloidal TiO<sub>2</sub> Nanocrystals with Engineered Defectivity and Optical Properties

*Julia J. Chang<sup>1</sup>, Bin Yuan<sup>2</sup>, Sandro Mignuzzi<sup>3</sup>, Riccardo Sapienza<sup>3</sup>, Francesco Mezzadri<sup>4</sup>  
Ludovico Cademartiri<sup>4\*</sup>*

<sup>1</sup> Department of Materials Science & Engineering, Iowa State University of Science and Technology, 2220 Hoover  
Hall, Ames, IA, 50011

<sup>2</sup> Department of Chemical & Biological Engineering, Iowa State University of Science and Technology, Gilman  
Hall, Ames, IA, 50011

<sup>3</sup> The Blackett Laboratory, Department of Physics, Imperial College London, London, SW7 2AZ, UK

<sup>4</sup> Department of Chemistry, Life Sciences and Environmental Sustainability, University of Parma, Parma, 43124,  
Italy

Author to whom correspondence should be addressed: ludovico.cademartiri@unipr.it

## Supporting Information

## Materials and Methods

*Colloidal nanoparticle synthesis:* Colloidal titanium dioxide nanoparticles synthesis was performed with Schlenk line under Argon atmosphere. 25g triocylphosphine oxide (TOPO, 90%, Strem Chemical, Inc.) was heated to 120 °C and degassed for 30 minutes. 1.0 mL titanium (IV) isopropoxide (TTIP, 97%, Sigma-Aldrich) and 0.3 mL titanium (IV) chloride (TiCl<sub>4</sub>, 99.9%, Sigma-Aldrich) were injected into TOPO. The solution was heated to reacting temperatures and kept there for 2 hours. After the reaction was done, the reaction product was cooled to 80 °C and 25 mL hexane was added into the solution before purification.

*Purification:* Acetone was added to diluted reaction product at the ratio of 1:1, then centrifugation was performed to centrifuge out the precipitated nanoparticles. After centrifugation, supernatant was discarded, and the precipitate was re-dispersed into hexane. This purifying cycle was repeated for 3 times and the final dispersion was centrifuged at 4000rpm for 10min and filtered through 0.2µm nylon filter.

*Sample preparation:* The TiO<sub>2</sub> nanoparticle colloidal solution after purification was used as solution sample directly for TEM, PL, photography (10 mg/mL) and UV-vis spectroscopy (0.1 mg/mL). Powder sample was obtained by air-drying colloidal solutions and finely grinded before used for photography, XRD and EPR characterization. TiO<sub>2</sub> thin film samples were prepared by spin-coating TiO<sub>2</sub> nanoparticle colloidal solution onto glass substrate.

*Plasma processing:* Oxygen and Helium plasma processing of TiO<sub>2</sub> film sample were done by using Harrick plasma cleaner with operating power of 30 Watt and chamber pressure of 500 mTorr. The processing time is 48 hours.

*X-ray Powder Diffraction (XRD):* XRD spectra were collected of TiO<sub>2</sub> powder samples by using Siemens D500 x-ray diffractometer. X-ray was created by copper X-ray tube with a wavelength of 1.54 Å.

*Transmission Electron Microscopy (TEM):* TEM images were obtained with 2007 JEOL 2100 200kV STEM in TEM mode, operating at 200 kV. Samples for the TEM characterization were made by casting a thin layer of a dilute nanoparticle dispersion on a 200 mesh copper grid coated with a carbon film.

*Ultraviolet-visible spectroscopy (UV-vis):* UV-vis spectra was collected by using Agilent 8453 UV-Vis instrument in the wavelength range of 190-1100 nm.

*Electron Paramagnetic Resonance (EPR):* EPR characterization was performed with ELEXSYS E580 FT-EPR instrument with ER 4122 SHQE Resonator at room temperature. Applied frequency is 9.5 GHz as continuous wave in X band, and the characterizing field sweep was from 3160 to 3560 G.

*Photoluminescence spectroscopy (PL):* Samples were optically pumped at room-temperature with a  $\lambda = 440$  nm CW laser (PicoQuant LDH-D-C-440). The emission was spectrally analysed using a grating spectrometer (Princeton Instruments Isoplane-320) equipped with a 800 gr mm<sup>-1</sup> holographic grating (0.05 nm resolution) and CCD camera (Princeton Instruments Pixis 400).

## Supporting Discussion

### *Crystalline size calculation<sup>1</sup>*

p is defined as true crystallite size with following equation:

$$p \equiv \text{cube root of the crystalline volume} \quad (1)$$

When TiO<sub>2</sub> nanoparticles are assumed as fully crystalline:

$$p_{TEM} = \text{cube root of octahedron} = \sqrt[3]{\frac{\sqrt{2}}{3}a^3} \approx 0.7783a \quad (2)$$

Where a is the side length of octahedron nanoparticles measured from the TEM images.

For XRD spectrum, the true crystalline size is defined as (3)

the following:  $\varepsilon = \frac{\lambda}{b \cos \theta}$

$$p_{XRD} = K\varepsilon \quad (4)$$

Where:

$\varepsilon$ : apparent crystallite size

$\lambda$ : wavelength of radiation

b: broadening in radian

$\theta$ : Bragg angle

K: Scherrer constant.

For calculating  $\varepsilon$ ,  $\lambda$  was 1.54 (5)

Angstrom. b was considered

for (101) diffraction peak.  $2\theta$

equals to 25.281° for (101)

diffraction peak. For

octahedron crystal shape,

Scherrer constant of (101)

plane is 0.8613. Taking in all

the parameters and we

$$\text{get } p_{XRD} = \frac{7.7885}{w} nm$$

Where w is the (101) peak full width of half maximum from Gaussian fitting in degrees after background subtraction. (Figure 1, SI)

The results of true crystallite size p obtained from TEM images and XRD spectrum are plotted in Figure 2, SI.

### *Tauc plot<sup>2</sup>*

Transition type of TiO<sub>2</sub> bandgap was determined by taking the 2<sup>nd</sup> derivative of TiO<sub>2</sub> solution UV-vis absorption spectrum. The intercept point of the 2<sup>nd</sup> derivative with 0 line represents for the

most linear relation between  $\alpha \cdot h\nu^{1/2}$  and  $h\nu$ . Data points lie in the range of (intercept-0.1, intercept+0.1) were fitted into linear functions for each sample. The intercept of the fitted line with x axis is the corresponding bandgap energy.

## Supporting Figures

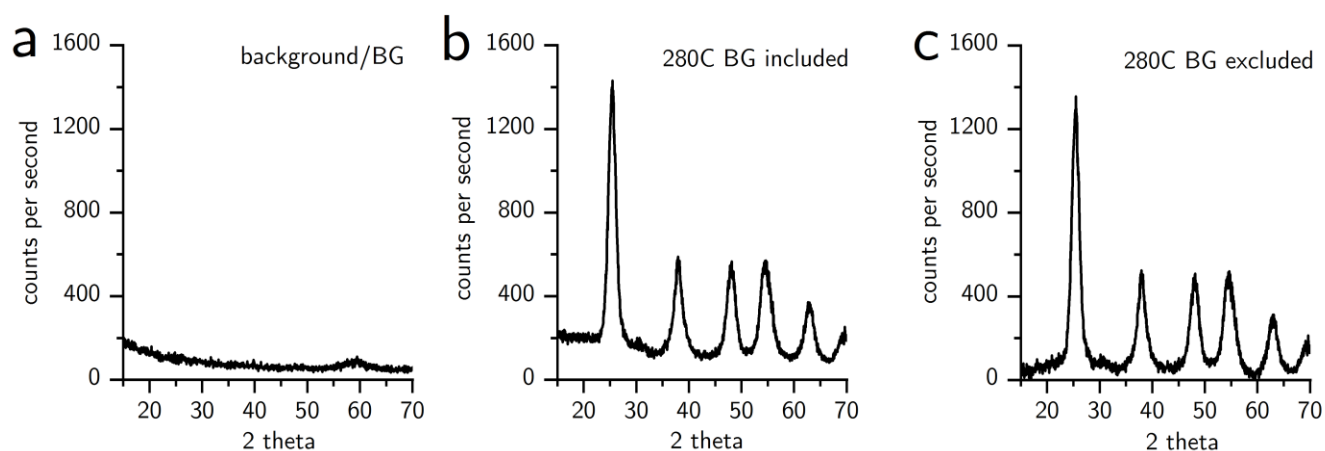

**Figure S1.** XRD spectrum background subtraction example of  $\text{TiO}_2$  powder samples synthesized at  $280^\circ\text{C}$ . (a) Background signal from sample holder, (b) Before and (c) after background subtracted.

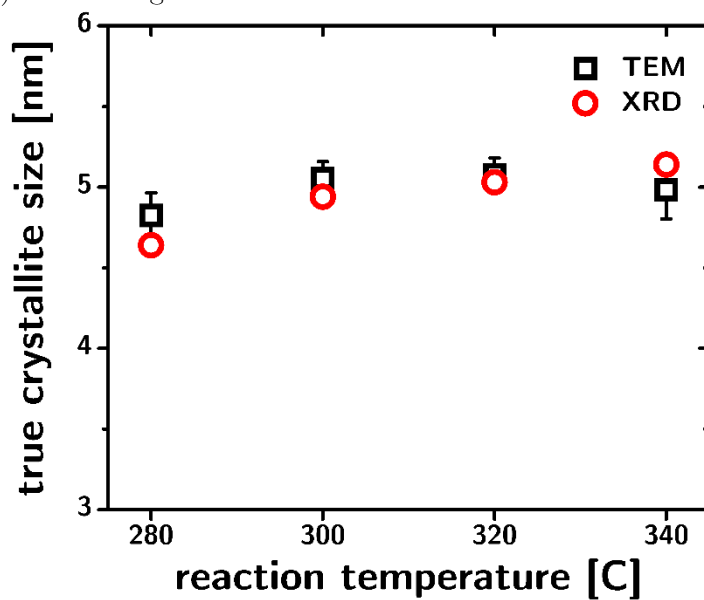

**Figure S2.** True crystallite size calculated from TEM images and XRD spectrum.

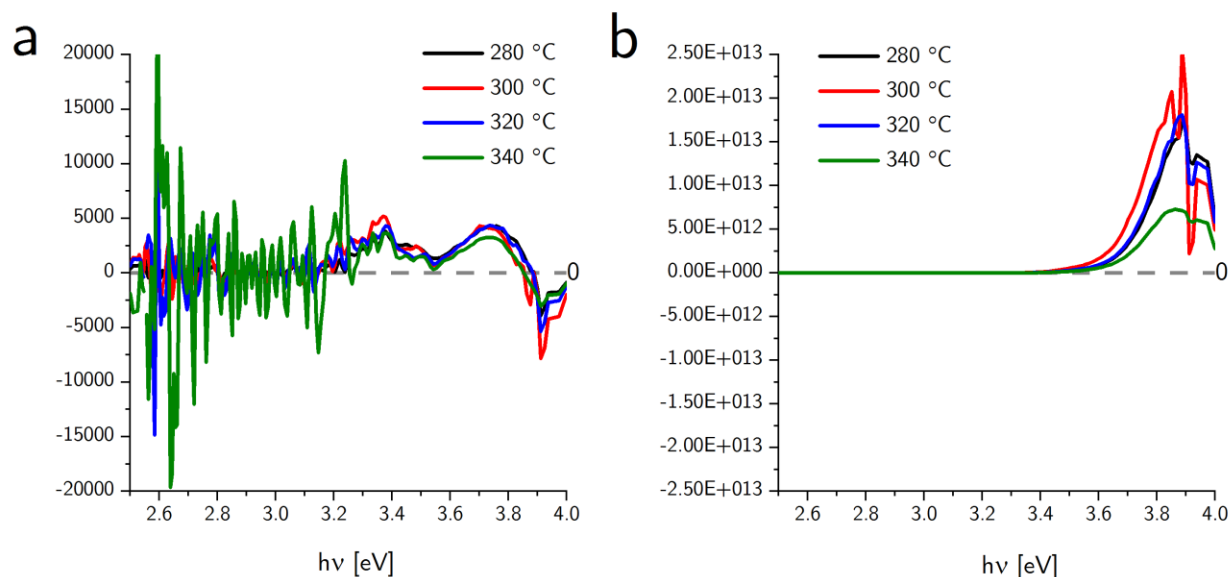

**Figure S3.** Determination of transition gap type by applying 2nd derivative operation to TiO<sub>2</sub> nanoparticle solution sample UV-vis absorption spectrum. (a)  $(\alpha \cdot h\nu)^{1/2}$  versus  $h\nu$  and (b)  $(\alpha \cdot h\nu)^2$  versus  $h\nu$ .

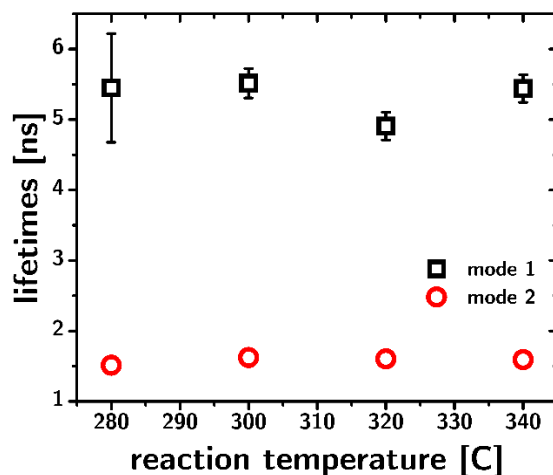

**Figure S4.** Photoluminescence lifetime of TiO<sub>2</sub> solution samples synthesized at different temperatures by using mode 1 and 2.

## References

1. J. I. Langford and A. Wilson, *Journal of applied crystallography*, 1978, **11**, 102-113.
2. N. Serpone, D. Lawless and R. Khairutdinov, *The journal of Physical Chemistry*, 1995, **99**, 16646-16654.
